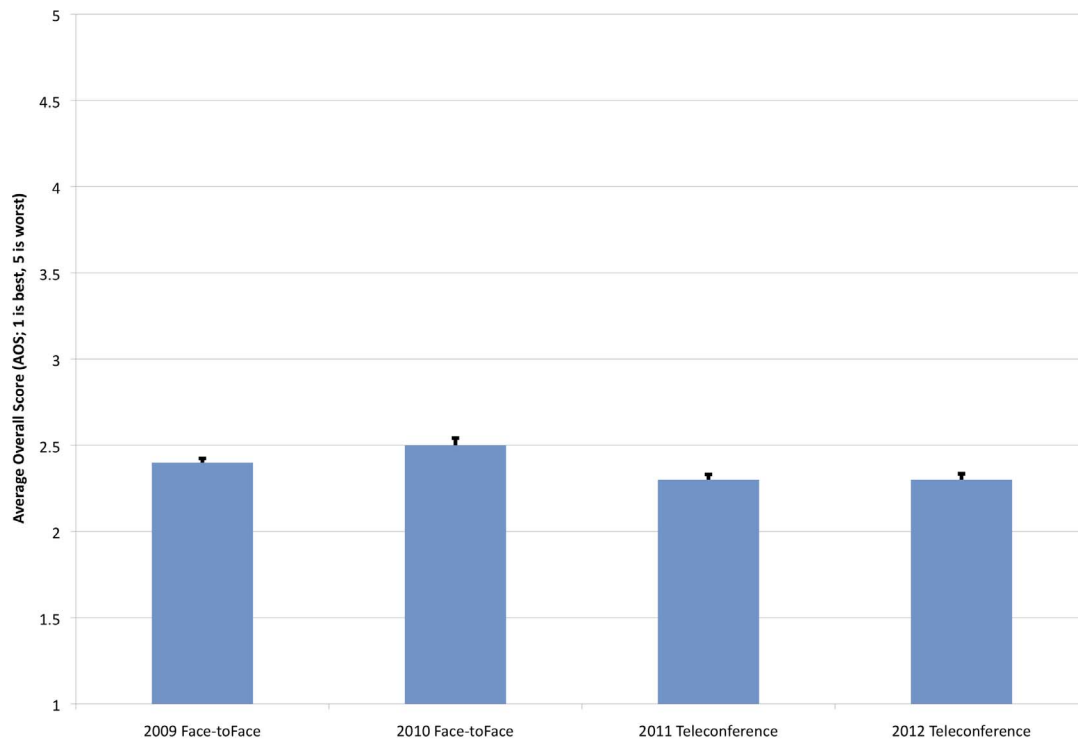

**Figure 1. Comparison of Average Overall Score (AOS).** Average score comparison between 2009, 2010 (face-to-face) and 2011, 2012 (teleconference) reviews. The total numbers of applications reviewed were 669, 291, 347, and 297 for 2009, 2010, 2011, and 2012, respectively. doi:10.1371/journal.pone.0071693.g001

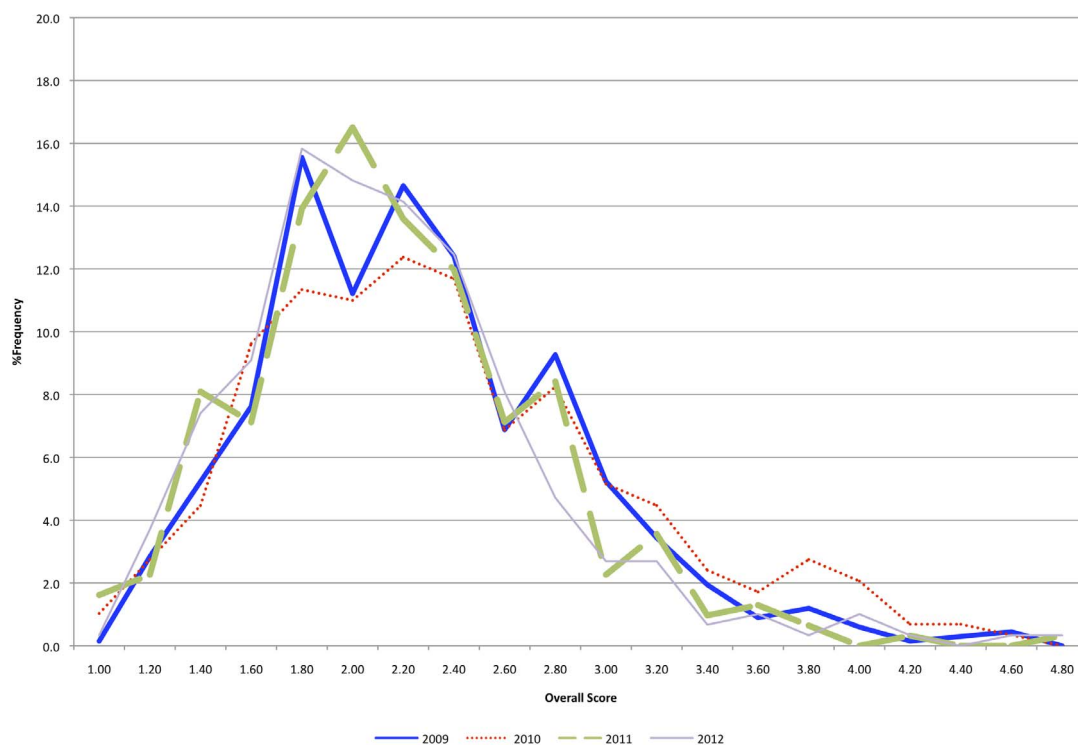

**Figure 2. Comparison of Overall Score (OS) Distribution.** Overall score (OS) distribution for all applications from 2009, 2010 (face-to-face) and from 2011, 2012 (teleconference) peer reviews. doi:10.1371/journal.pone.0071693.g002

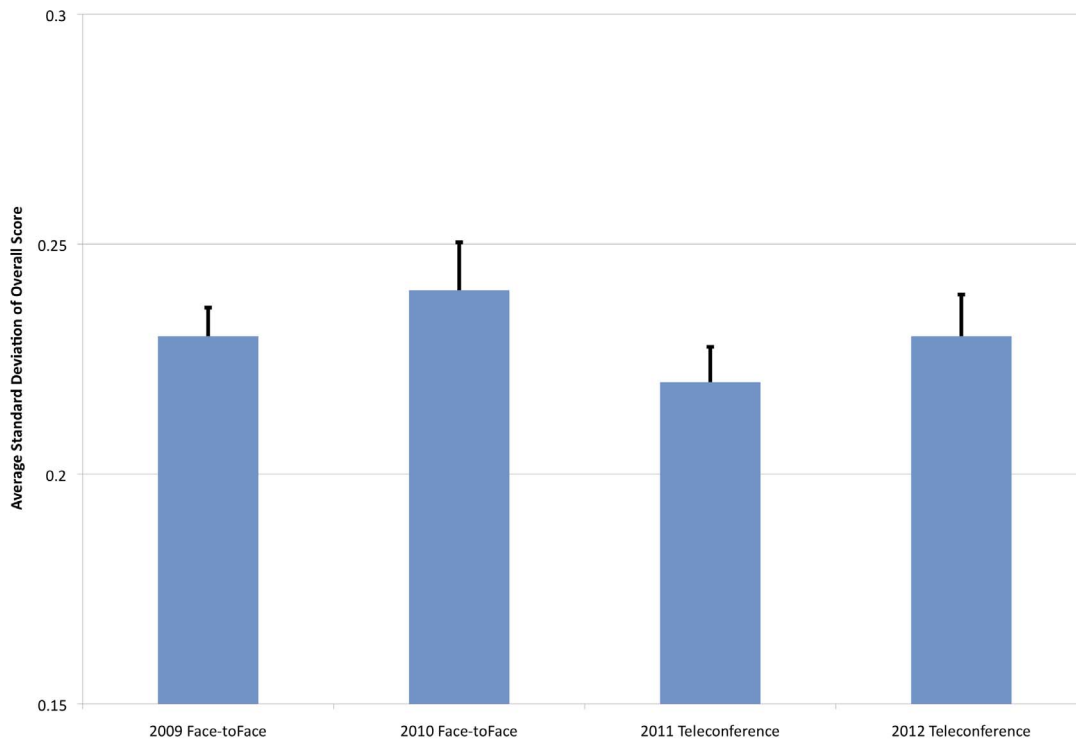

**Figure 3. Comparison of Average Standard Deviation of Individual Reviewer Merit Scores.** Average standard deviation of individual reviewer merit scores per application, comparing 2009, 2010 (face-to-face) and 2011, 2012 (teleconference) reviews. doi:10.1371/journal.pone.0071693.g003

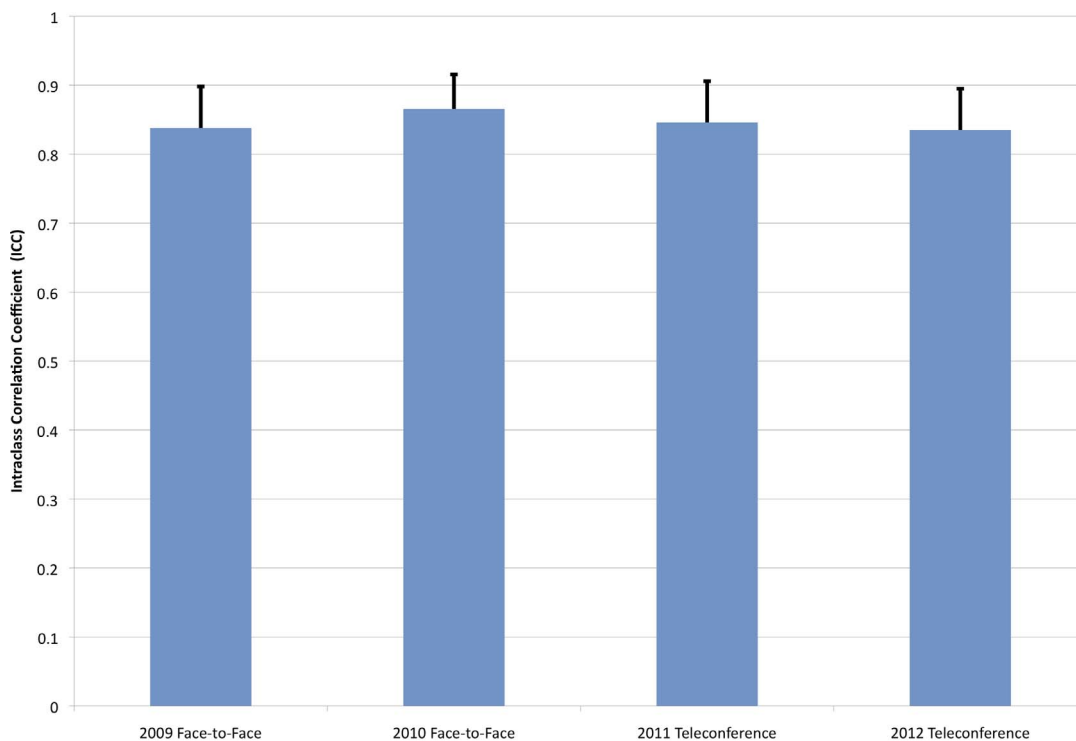

**Figure 4. Comparison of Intraclass Correlation.** Intraclass correlation for 2009, 2010 (face-to-face) and 2011, 2012 (teleconference) reviews ( $p < 0.01$  for all years). doi:10.1371/journal.pone.0071693.g004

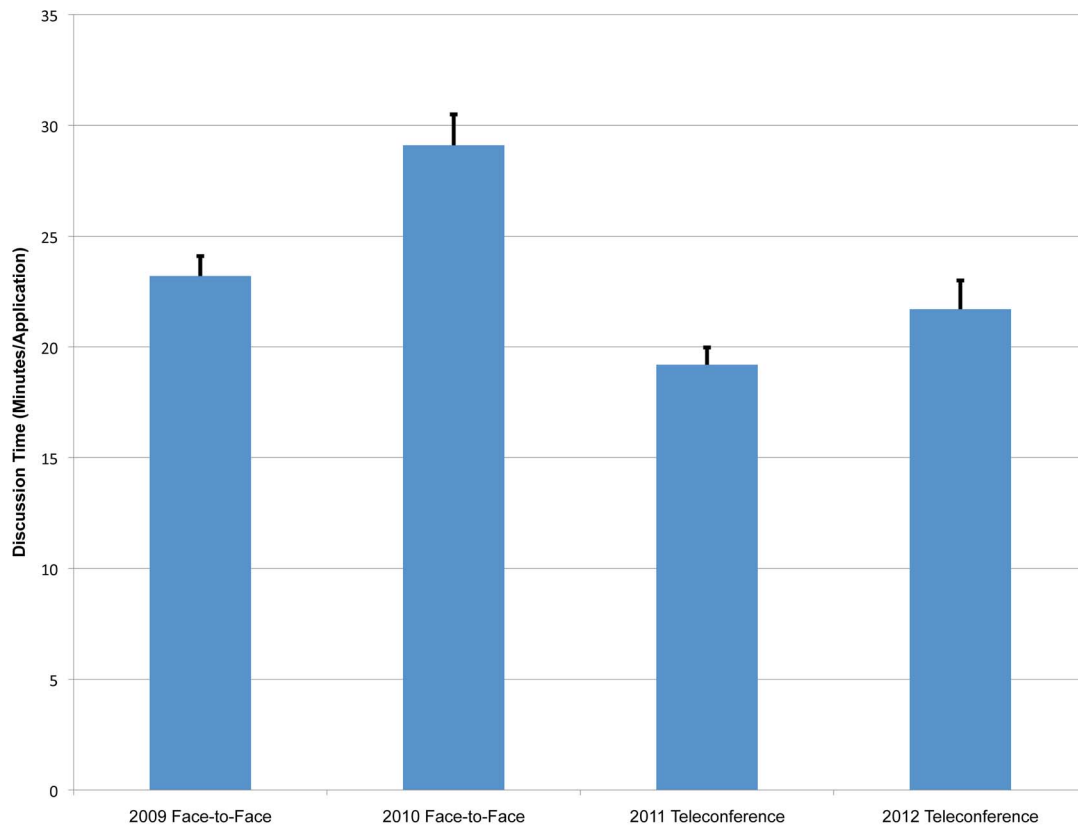

**Figure 5. Comparison of Average Discussion Time per Application.** Average discussion time per application over all panels for face-to-face (2009–2010) and teleconference (2011–2012) years. In 2009, there was an average of 28 applications per panel, whereas in 2010, 2011 and 2012, there were averages of 18, 16, and 20 applications, respectively, per panel. doi:10.1371/journal.pone.0071693.g005

12.24). This difference may be in part due to the review setting, as reviewers are “captive” at face-to-face meetings. This physical restriction may lend itself to extended peripheral discussions. In contrast, discussion during teleconference reviews may be more focused and efficient, as reviewers have a reduced level of interaction and can quickly reengage into their daily activities once the teleconference has ended. It should be noted that no correlation was observed between average panel scores and discussion time (data not shown).

Video teleconferencing has been suggested as a virtual hybrid of face-to-face and teleconference meetings. In order to explore this mechanism for grant application review, AIBS piloted two video teleconference panels in 2011 (with 6 applications reviewed by one panel and 9 applications reviewed by the other). We observed average application discussion times of 15 and 17 minute per application, respectively, which are lower than the overall 2011 and 2012 teleconference averages (19 and 22 minutes/application, respectively), suggesting that video teleconferencing does not avoid the loss in discussion time seen in teleconferences. This observation is consistent with the literature [20].

### Reviewer Recruitment

AIBS staff have also tracked review panel member demographics over time for this program, to get a sense of whether review setting has a significant effect on reviewer recruitment. In **Figure 6** the proportion of review panel members with MD or equivalent only, both MD and PhD, and PhD or equivalent only degrees are plotted over time. These data show that roughly 15–25% held an MD or equivalent degree, 15–20% held an MD/PhD degree, and

55–70% held a PhD or equivalent degree for all years. In terms of seniority of review panel members, the data displayed in **Figure 7** show that roughly 35–45% had achieved a senior academic level or equivalent (Full Professor, Chair, Dean, and/or Director), 30–35% had achieved an intermediate level (Associate Professor) and 20–35% were junior level (Assistant Professor or equivalent) for all years. These distributions seem unaffected by whether the review setting was via teleconference or face-to-face. Given that the type of research proposed was not radically different in scope or clinical relevance over this time span, this suggests that the recruitment of appropriate reviewers (in terms of clinical experience and seniority) was unaffected by review setting.

### Survey Data

AIBS routinely surveys reviewers for quality control purposes and to identify any areas in which improvement can be made. In light of the change in setting from face-to-face to teleconference, we polled reviewers to see if they felt the setting had any influence on the outcome of the review. Survey data from 2012 (N = 90) assessed peer review quality using a questionnaire with answers scored on a scale of 1.0 to 5.0 (where 5 is the best and 1 is the worst).

For the question “To what extent did you find the panel discussions fair and thorough?” an average answer of 4.5 was returned, with 98% of reviewers scoring above a 3.0 (98% of surveyed reviewers answered this question). This question was asked in a 2008 survey of this program (when a face-to-face review setting was employed), which also resulted in an average answer of 4.5.

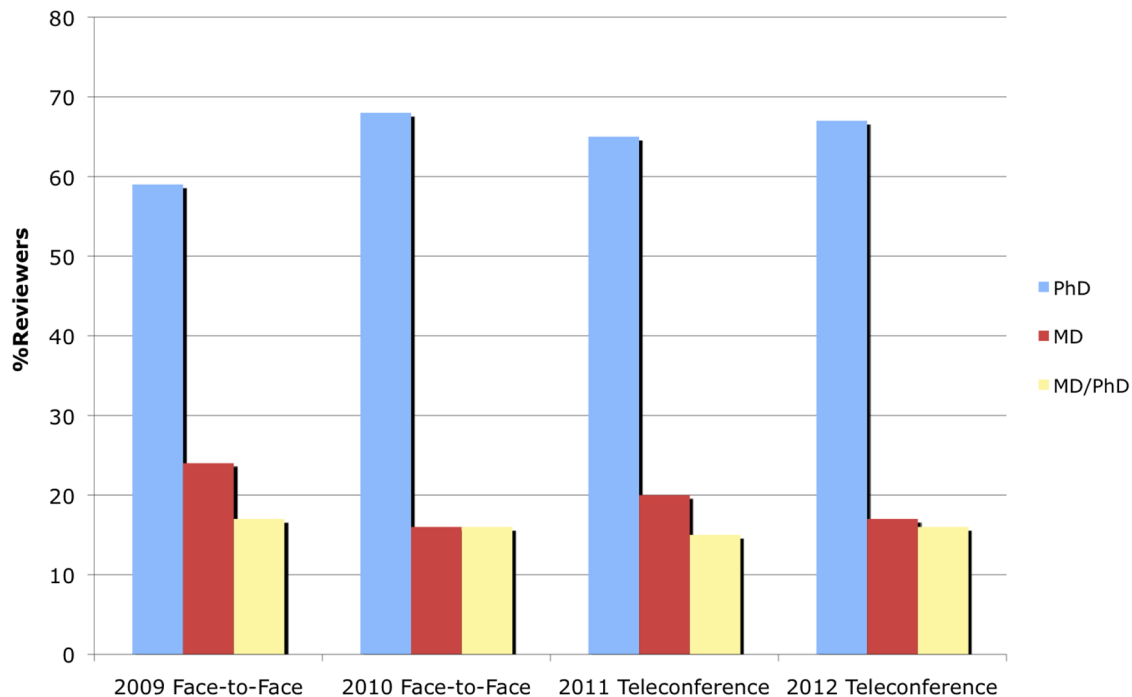

**Figure 6. Comparison of Reviewer Degrees.** Relative proportions of reviewer degrees for each year (MD, MD/PhD, and PhD). doi:10.1371/journal.pone.0071693.g006

For the question “Thinking of your past experiences with in-person, on-site review panels, to what extent did the teleconference review panel format achieve a thorough review of each application?” an average score of 4.0 was returned, with 77% of

reviewers scoring above a 3.0 (81% of surveyed reviewers answered this question).

These questions relate to the thoroughness and equity of the review discussions themselves. This issue is of importance

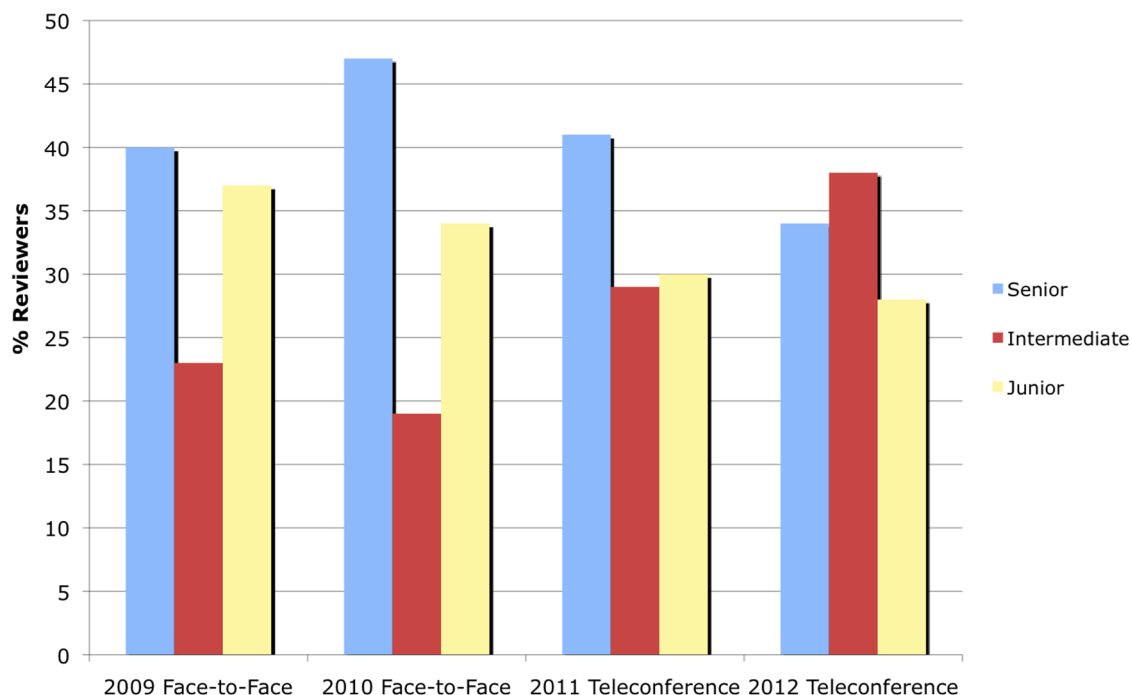

**Figure 7. Comparison of Reviewer Seniority.** Relative proportion of reviewers in terms of seniority for each year. The senior academic level grouping included full professors, chairs, deans, and/or directors, the intermediate level grouping included associate professors, and the junior level grouping included assistant professors or equivalents. doi:10.1371/journal.pone.0071693.g007



19. Hargens LL, Herting JR (1990) Neglected Considerations in the analysis of the Agreement among Journal Referees. *Scientometrics*, 19: 91–106.
20. Egidio C (1990) Teleconferencing as a technology to support cooperative work: It's possibilities and limitations. In: Galegher J, Kraut RE, and Egidio C, *Intellectual teamwork: Social and technological foundations of cooperative work* Hillsdale, NJ: Erlbaum. 351–371.
21. Alberts B, Hanson B, Kehler KL (2008) Reviewing Peer Review. *Science*, 321: 15
22. Wessely S (1998) Peer Review of Grant Applications: What Do We Know? *Lancet*, 352: 301–305.
23. Rogelberg SC, O'Connor MS, Sederburg M (2002) Using the stepladder technique to facilitate the performance of audioconferencing groups. *J. Applied Psychology* 87(5): 994–1000.
24. Obrecht M, Tibelius K, Aloisio GD (2007) Examining the value added by committee discussion in the review of applications for research awards. *Research Evaluation*, 16(2): 79–91.
